# Supplementary material
Source: Springer Nature journal article supplement (https://www.springermedizin.de/resource/supplementary/12876_2010_643_MOESM2_ESM.pdf/9437140)

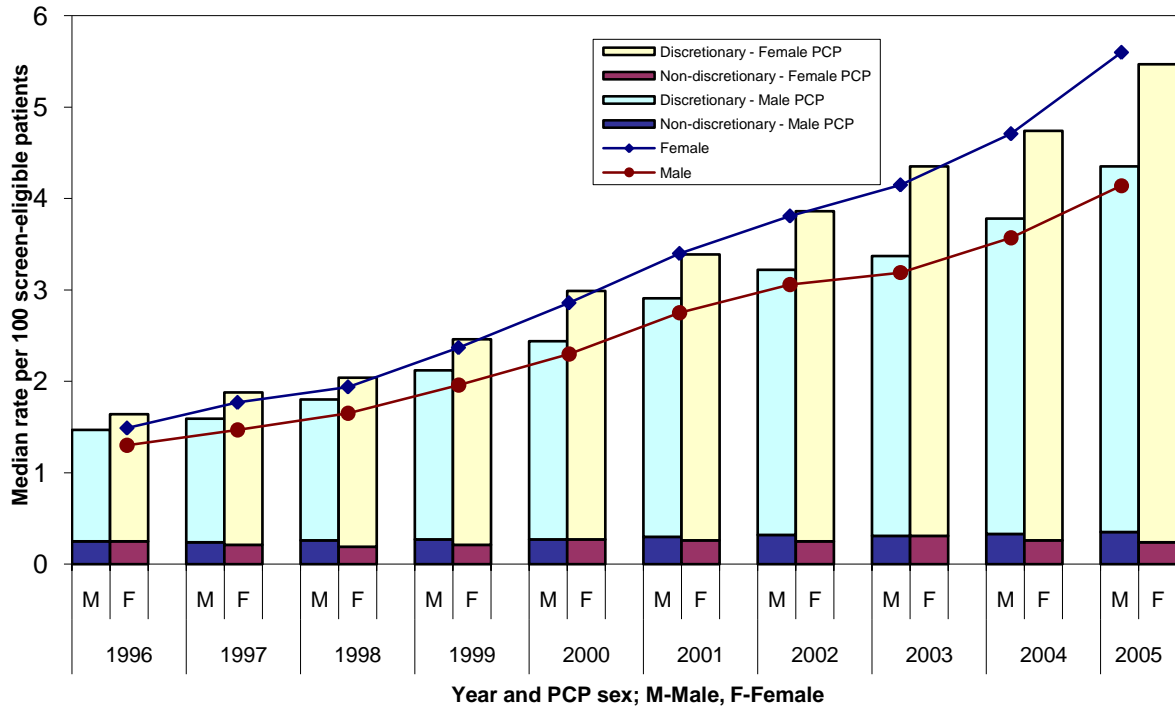

Supplement: MOESM2 [file 9437140]
